# Supplementary material for: Solution-processable benzothiadiazole/triphenylamine-based hybridized local and charge-transfer (HLCT) hyper-structured molecular red emitters for OLEDs
Source: Royal Society of Chemistry journal article supplement (doi:10.1039/d4tc02377c), 2024-11-14
Supplement: d4tc02377c1.pdf [file d4tc02377c1.pdf]

## Electronic Supporting Information (ESI)

### **Solution-processable Benzothiadiazole/triphenylamine-based hybridized local and charge-transfer (HLCT) hyper-structured molecular red emitter for OLEDs**

Xiaoyu Yin<sup>a</sup>, Junrong Pu<sup>b</sup>, Chen Ma<sup>a</sup>, Yi Wu<sup>a</sup>, Kunlun Wang<sup>a</sup>, Yingliang Liu<sup>a</sup>,  
Shaokui Cao<sup>a</sup>, Shi-Jian Su<sup>b, \*</sup>, Shengang Xu<sup>a, \*</sup>

\* Corresponding author.

E-mail addresses: xusg@zzu.edu.cn (S. Xu), mssjsu@scut.edu.cn (S. Su).

#### **Table of contents:**

|                                                                     |             |
|---------------------------------------------------------------------|-------------|
| 1. Instrumentation                                                  |             |
| 2. Synthesis                                                        | Scheme S1-3 |
| 3. <sup>1</sup> H NMR spectra                                       | Fig. S1-2   |
| 4. MALDI-TOF MS spectra                                             | Fig. S3     |
| 5. FTIR spectra                                                     | Fig. S4     |
| 6. Thermal analysis                                                 | Fig. S5     |
| 7. XRD patterns                                                     | Fig. S6     |
| 8. Cyclic voltammogram curves                                       | Fig. S7     |
| 9. Solvatochromic effect and supplementary photophysical properties | Fig. S8-9   |
| 10. Lippert–Mataga calculation                                      | Table S1    |
| 11. Device fabrication and measurement                              | Fig. S10    |
| 12. OLED performance                                                | Fig. S11-13 |

## 1 Instrumentation

<sup>1</sup>H NMR spectra were taken on Bruker DPX-600 and Bruker DPX-400 Spectrometer at room temperature. Chemical shift values are reported in parts per million (ppm) relative to tetramethylsilane (TMS) (0 ppm) as an internal standard. Fourier transform infrared spectra (FT-IR) spectra were acquired using a Nicolet Is-10 spectrometer over the wavenumber range of 500-4000 cm<sup>-1</sup> on KBr pellets. Mass spectra were determined by a Bruker Autoflex Speed MALDA-TOF in the linear mode, and trans-2-[3-(4-tert-Butylphenyl)-2-methyl-2-propenylidene] malononitrile was used as the matrix. Thermal properties were determined by thermogravimetric analysis (TGA) using a Mettler Toledo TGA/DSC simultaneous thermal analyzer at a heating rate of 10 °C min<sup>-1</sup> under nitrogen. Differential scanning calorimetry (DSC) was performed on a NETZSCH STA449F3 Jupiter differential scanning calorimeter at a heating rate of 10 °C min<sup>-1</sup> from 20 to 250 °C under nitrogen. All DSC data were collected from the second cycle of the DSC curve. The X-ray diffraction (XRD) patterns were performed on a Bruker AXS D8 Advance diffractometer with Cu K $\alpha$  radiation. UV-Vis absorption spectra were recorded on an Agilent Cary 5000 UV-Vis-NIR spectrophotometer. Photoluminescence (PL) spectra were obtained using a photoluminescence spectrometer (Horiba Jobin Yvon, FluoroMax-4). Cyclic voltammetry (CV) studies were conducted using a CHI 660E voltammetry analyzer in a typical three-electrode cell with a platinum sheet working electrode, a platinum wire counter electrode, and a silver/silver nitrate (Ag/Ag<sup>+</sup>) reference electrode. The oxidation and reduction potentials were measured in acetonitrile solution with 0.1 M of tetrabutylammonium perchlorate as a supporting electrolyte at a scan rate of 0.05 V/s. Transient PL decay spectra were conducted on FLS980 (Edinburgh Instrument), the delayed spectra were measured in FLS980 utilizing a time-gated controller.

## 2 Synthesis

### 2.1 Synthesis of mCP-N<sub>3</sub>

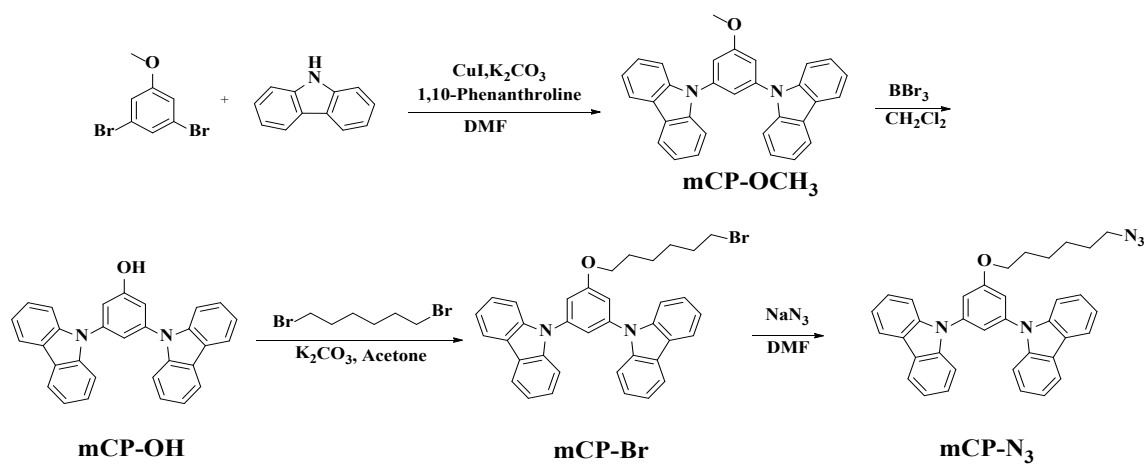

Scheme S1. Synthetic routes of mCP-N<sub>3</sub>.

### 2.2 Synthesis of CRA-Alkyne

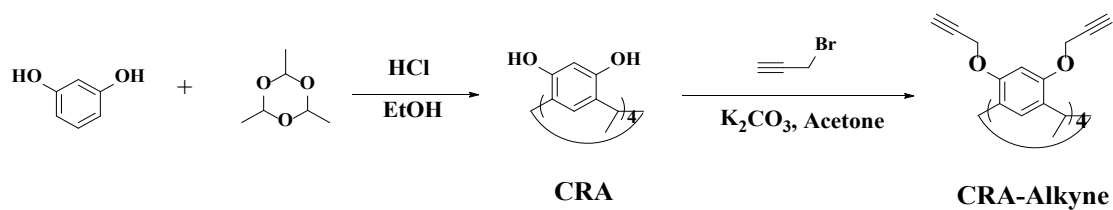

Scheme S2. Synthetic routes of CRA-Alkyne.

CRA-Alkyne was synthesized and structurally confirmed based on our previous work[1] and mCP-N<sub>3</sub> was synthesized according to the literature method[2-4].

### 2.3 Synthesis of MTBP-N<sub>3</sub>

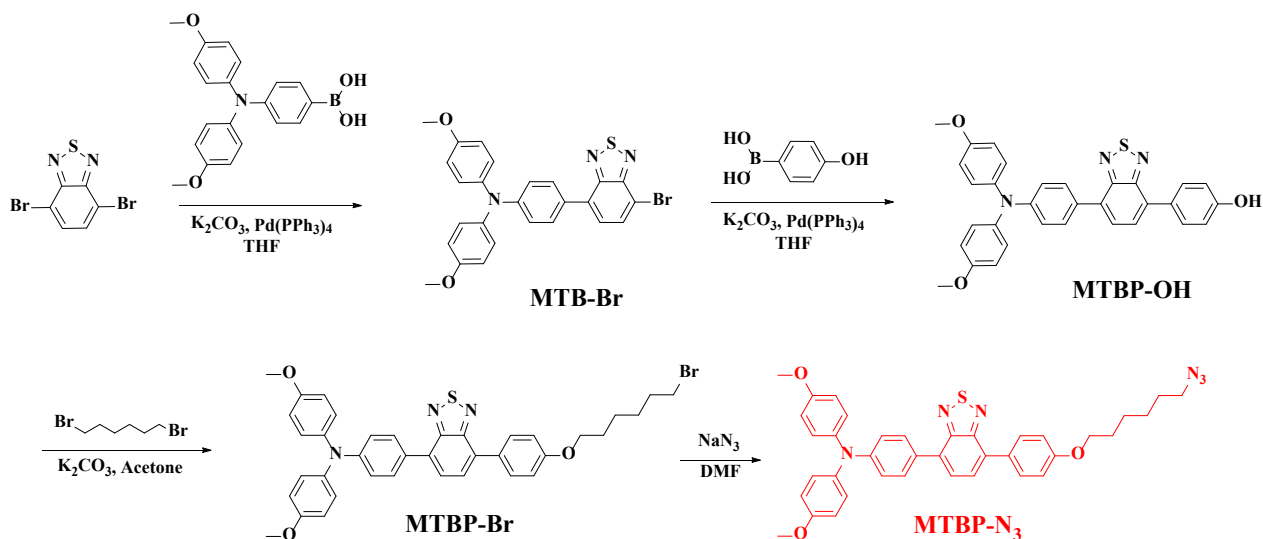

**Scheme S3.** Synthetic routes of MTBP-N<sub>3</sub>.

**MTB-Br:** 4,7-dibromo-2,1,3-benzothiadiazole (2.65 g, 9.0 mmol) and 4-(bis(4-methoxyphenyl)amino)phenylboronic acid (2.10 g, 6.0 mmol) were dissolved in THF (40 mL), and 18 mL of K<sub>2</sub>CO<sub>3</sub> (2.0 M aqueous solution) was added to the mixture, then the catalytic amount of Pd(PPh<sub>3</sub>)<sub>4</sub> was added to the mixture in nitrogen atmosphere. The mixture was heated to 80 °C and stirred for 8 h. After the reaction was completed, the mixture was cooled to room temperature, extracted with dichloromethane, washed with deionized water, dried with anhydrous MgSO<sub>4</sub>, filtered and concentrated. The crude product was purified by silica gel column chromatography with dichloromethane/petroleum ether (1/5, v/v) as eluent. A red solid powder was obtained with a yield of 70.1% (2.18 g). <sup>1</sup>H NMR (400 MHz, CDCl<sub>3</sub>) δ 7.90 (d, J = 7.7 Hz, 1H), 7.80 – 7.73 (m, 2H), 7.53 (d, J = 7.6 Hz, 1H), 7.18 – 6.86 (m, 10H), 3.84 (s, 6H).

**MTBP-OH:** MTB-Br (1.97 g, 3.8 mmol) and 4-hydroxyphenylboronic acid (786.2 mg, 5.7 mmol) were dissolved in THF (40 mL), and 14 mL of K<sub>2</sub>CO<sub>3</sub> (2.0 M aqueous solution) was added to the mixture, then the catalytic amount of Pd(PPh<sub>3</sub>)<sub>4</sub> was added to the mixture in nitrogen atmosphere. The mixture was heated to 80 °C and stirred for 15 h. After the reaction was completed, the mixture was cooled to room temperature, extracted with dichloromethane, washed with deionized water, dried with anhydrous MgSO<sub>4</sub>, filtered and concentrated. The crude product was purified by silica gel column chromatography with ethyl acetate/petroleum ether (1/5, v/v) as eluent. A red solid powder was obtained with a yield of 83.7% (1.69 g). <sup>1</sup>H NMR (400 MHz, DMSO-d<sub>6</sub>) δ 9.74 (s, 1H), 7.91 – 7.77 (m, 6H), 7.14 – 7.07 (m, 4H), 6.98 – 6.87 (m, 8H), 3.76 (s, 6H).

**MTBP-Br:** MTBP-OH (1.49 g, 2.8 mmol) and 1,6-dibromohexane (1.55 g, 11.2 mmol) were dissolved in acetone (50 mL), and anhydrous K<sub>2</sub>CO<sub>3</sub> (1.55 g, 11.2 mmol) was added. The mixture was heated to 60 °C and stirred

for 12 h. After the reaction was completed, the mixture was cooled to room temperature, extracted with dichloromethane, washed with deionized water, dried with anhydrous  $\text{MgSO}_4$ , filtered and concentrated. The crude product was purified by silica gel column chromatography with dichloromethane/petroleum ether (1/3, v/v) as eluent. A red solid powder was obtained with a yield of 91.4 % (1.78 g).  $^1\text{H NMR}$  (400 MHz,  $\text{CDCl}_3$ )  $\delta$  7.97 – 7.71 (m, 6H), 7.24 – 6.84 (m, 12H), 4.08 (t,  $J = 6.4$  Hz, 2H), 3.84 (s, 6H), 3.47 (t,  $J = 6.7$  Hz, 2H), 1.91 (dt,  $J = 27.3, 6.9$  Hz, 4H), 1.60 – 1.55 (m, 4H).

**MTBP- $\text{N}_3$** : MTBP-Br (1.39 g, 2.0 mmol) was dissolved in DMF (30 mL) and sodium azide (520.1 mg, 8.0 mmol) was added in a nitrogen atmosphere. The mixture was heated to 60 °C and stirred for 12 h. After the reaction was completed, the mixture was cooled to room temperature, extracted with dichloromethane, washed with saturated NaCl solution, dried with anhydrous  $\text{MgSO}_4$ , filtered and concentrated. The crude product was purified by silica gel column chromatography with dichloromethane/petroleum ether (1/3, v/v) as eluent. A red solid powder was obtained with the yield of 93.5 % (1.23 g).  $^1\text{H NMR}$  (400 MHz,  $\text{CDCl}_3$ )  $\delta$  7.97 – 7.71 (m, 6H), 7.24 – 6.84 (m, 12H), 4.08 (t,  $J = 6.4$  Hz, 2H), 3.84 (s, 6H), 3.47 (t,  $J = 6.7$  Hz, 2H), 1.91 (dt,  $J = 27.3, 6.9$  Hz, 4H), 1.60 – 1.55 (m, 4H). FT-IR (KBr),  $\nu$  ( $\text{cm}^{-1}$ ): 2936  $\text{cm}^{-1}$ , 2864  $\text{cm}^{-1}$  (-C-H), 2090  $\text{cm}^{-1}$  ( $-\text{N}_3$ ), 1487  $\text{cm}^{-1}$  (-C=N-, benzothiazole). HR-MS (EI)  $m/z$ : [  $\text{M}+\text{H}$  ] $^+$  calcd for  $\text{C}_{38}\text{H}_{36}\text{N}_6\text{O}_3\text{S}$  656.2631; found, 657.2644.

## 2.4 Synthesis of CRA-MTBP $_{(X)}$ -mCP $_{(8-X)}$ (X=8, 7, 6, 4, 2, 1 or 0)

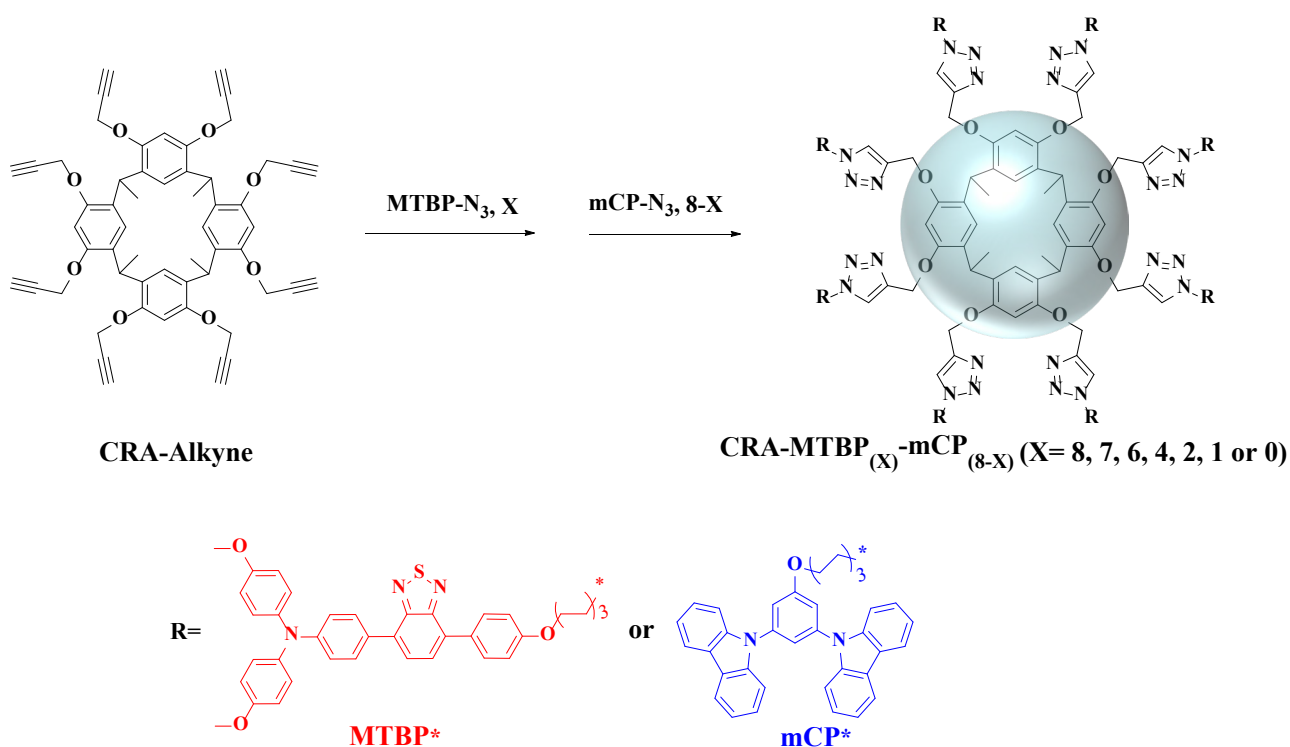

**Scheme S4.** Synthetic routes of CRA-MTBP $_{(X)}$ -mCP $_{(8-X)}$  (X=8, 7, 6, 4, 2, 1 or 0)

**General synthesis of HSMs using CRA- MTBP<sub>(7)</sub>-mCP<sub>(1)</sub> as an example.** CRA-Alkyne (34.0 mg, 0.04 mmol including 0.32 mmol alkynyl group) and MTBP-N<sub>3</sub> (184.2 mg, 0.28 mmol) were added into a Schlenk tube (20 mL), then PMDETA (124  $\mu$ L, 0.08 mmol) and CuBr (57.8 mg, 0.40 mmol) were added under nitrogen atmosphere, respectively, and then the purified THF (10 mL) was added. The mixture was heated to 60 °C and stirred for 8 h without light. Subsequently, mCP-N<sub>3</sub> (65.9 mg, 0.12 mmol) was added to the mixture under a nitrogen atmosphere. The mixture was heated to 60 °C and stirred for other 16 h without light. After that, the reaction mixture was exposed to air and stirred for 2h, then 1,4,7,10-tetraazacyclododecane (173.5 mg, 1.00 mmol) was added and stirred for 2 h. The reaction mixture was filtered through celite, extracted with dichloromethane, transferred to a separatory funnel, washed with deionized water, dried with anhydrous MgSO<sub>4</sub>, filtered, and concentrated. The crude product was purified by silica gel column chromatography. The crude product was purified by silica gel column chromatography using ethyl acetate/dichloromethane (1/1, v/v) as eluent. Then the obtained product was purified by Soxhlet extraction with methanol for 3 days. A red solid powder was obtained with a yield of 67.4 % (139.4 mg). <sup>1</sup>H NMR (400 MHz, CDCl<sub>3</sub>)  $\delta$  7.86 (d, J = 8.2 Hz, 1H), 7.79 (d, J = 8.0 Hz, 2H), 7.59 (dd, J = 28.9, 12.0 Hz, 2H), 7.28 (s, 1H), 7.14 (d, J = 8.8 Hz, 3H), 7.02 (dd, J = 25.9, 8.5 Hz, 4H), 6.91-6.82 (m, 3H), 5.19 (d, J = 13.9 Hz, 1H), 4.40 (s, 1H), 4.31 (s, 1H), 3.97 (s, 2H), 3.82 (s, 4H), 1.98 (s, 1H), 1.91 (s, 1H), 1.53 (s, 1H), 1.44 (s, 3H), 1.43 (s, 0H). FT-IR (KBr),  $\nu$  (cm<sup>-1</sup>): 2864 (-C-H), 1487 cm<sup>-1</sup> (-C=N-, benzothiazole). MALDI-TOF MS m/z: [M+H]<sup>+</sup> calcd for C<sub>358</sub>H<sub>331</sub>N<sub>47</sub>O<sub>30</sub>S<sub>7</sub> 5992.3946; found, 6006.2631.

**CRA-MTBP<sub>(8)</sub>-mCP<sub>(0)</sub>.** The synthetic method of CRA-MTBP<sub>(8)</sub>-mCP<sub>(0)</sub> was the same as CRA-MTBP<sub>(7)</sub>-mCP<sub>(1)</sub> but only MTBP-N<sub>3</sub> (262.7 mg, 0.40 mmol) was used for 16 h to obtain a red solid (231.52 mg, 93.1%). <sup>1</sup>H NMR (400 MHz, CDCl<sub>3</sub>)  $\delta$  7.86 (d, J = 8.2 Hz, 2H), 7.79 (d, J = 8.4 Hz, 3H), 7.63 (d, J = 15.8 Hz, 2H), 7.48 (s, 0H), 7.14 (d, J = 8.5 Hz, 5H), 7.02 (dd, J = 25.2, 8.4 Hz, 5H), 6.91-6.83 (m, 4H), 5.19 (d, J = 12.2 Hz, 1H), 4.82 (d, J = 11.2 Hz, 1H), 4.41 (s, 1H), 4.32 (s, 1H), 3.98 (d, J = 6.8 Hz, 2H), 3.82 (s, 5H), 2.42 (s, 1H), 2.25 (s, 1H), 1.99 (s, 1H), 1.91 (s, 1H), 1.79 (t, J = 7.4 Hz, 2H), 1.44 (d, J = 7.4 Hz, 3H). FT-IR (KBr),  $\nu$  (cm<sup>-1</sup>): 2864 (-C-H), 1487 cm<sup>-1</sup> (-C=N-, benzothiazole). MALDI-TOF MS m/z: [M+H]<sup>+</sup> calcd for C<sub>360</sub>H<sub>336</sub>N<sub>48</sub>O<sub>32</sub>S<sub>8</sub> 6099.3987; found, 6099.6352.

**CRA-MTBP<sub>(6)</sub>-mCP<sub>(2)</sub>.** MTBP-N<sub>3</sub> (158.3 mg, 0.24 mmol) and mCP-N<sub>3</sub> (87.9 mg, 0.16 mmol) were used to obtain a red solid (200.4 mg, 85.5%). <sup>1</sup>H NMR (400 MHz, CDCl<sub>3</sub>)  $\delta$  8.13 (d, J = 7.8 Hz, 1H), 7.86 (d, J = 8.1 Hz, 1H), 7.79 (d, J = 8.0 Hz, 2H), 7.65 (s, 1H), 7.62-7.52 (m, 1H), 7.41 (t, J = 7.6 Hz, 1H), 7.28 (s, 1H), 7.14 (d, J = 8.1 Hz, 3H), 7.09-7.00 (m, 2H), 6.98 (s, 1H), 6.91-6.83 (m, 3H), 5.17 (s, 1H), 4.80 (s, 0H), 4.40 (s, 1H), 4.30 (s, 2H), 3.97 (s, 2H), 3.82 (s, 4H), 1.98 (s, 1H), 1.90 (s, 1H), 1.78 (s, 2H), 1.46 (s, 1H), 1.43 (s, 5H). FT-IR (KBr),  $\nu$  (cm<sup>-1</sup>):

2864 (-C-H), 1487  $\text{cm}^{-1}$  (-C=N-, benzothiazole).

**CRA-MTBP<sub>(4)</sub>-mCP<sub>(4)</sub>**, MTBP-N<sub>3</sub> (105.1 mg, 0.16 mmol) and mCP-N<sub>3</sub> (131.9 mg, 0.24 mmol) were used to obtain a red solid (160.9 mg, 73.1%). <sup>1</sup>H NMR (400 MHz, CDCl<sub>3</sub>)  $\delta$  8.12 (s, 1H), 7.85 (s, 1H), 7.80 (s, 1H), 7.64 (s, 1H), 7.55 (d, J = 8.3 Hz, 2H), 7.42 (s, 1H), 7.21- 7.11 (m, 2H), 7.05 (d, J = 8.1 Hz, 1H), 6.98 (s, 1H), 6.91-6.83 (m, 2H), 5.16 (s, 1H), 4.64 (s, 1H), 4.30 (s, 1H), 3.97 (s, 2H), 3.82 (d, J = 1.7 Hz, 2H), 2.15 (s, 0H), 1.89 (s, 2H), 1.78 (s, 1H). FT-IR (KBr),  $\nu$  ( $\text{cm}^{-1}$ ): 2864 (-C-H), 1487  $\text{cm}^{-1}$  (-C=N-, benzothiazole).

**CRA-MTBP<sub>(2)</sub>-mCP<sub>(6)</sub>**, MTBP-N<sub>3</sub> (53.1 mg, 0.08 mmol) and mCP-N<sub>3</sub> (175.9 mg, 0.32 mmol) were used to obtain a red solid (137.2 mg, 66.6%). <sup>1</sup>H NMR (400 MHz, CDCl<sub>3</sub>)  $\delta$  8.12 (s, 2H), 7.80 (s, 1H), 7.56 (dt, J = 6.4, 3.1 Hz, 2H), 7.42 (d, J = 8.6 Hz, 2H), 7.28 (s, 0H), 7.21 – 7.11 (m, 2H), 7.02 (dd, J = 27.0, 9.0 Hz, 1H), 6.92 – 6.84 (m, 1H), 5.11 (s, 1H), 4.26 (s, 2H), 3.97 (s, 2H), 3.83 (d, J = 1.7 Hz, 1H), 1.86 (s, 3H), 1.43 (s, 4H). FT-IR (KBr),  $\nu$  ( $\text{cm}^{-1}$ ): 2864 (-C-H), 1487  $\text{cm}^{-1}$  (-C=N-, benzothiazole).

**CRA-MTBP<sub>(1)</sub>-mCP<sub>(7)</sub>**, MTBP-N<sub>3</sub> (23.9 mg, 0.04 mmol) and mCP-N<sub>3</sub> (197.9 mg, 0.36 mmol) were used to obtain a red solid (121.8 mg, 61.2%). <sup>1</sup>H NMR (400 MHz, CDCl<sub>3</sub>)  $\delta$  8.11 (s, 2H), 7.56 (d, J = 8.4 Hz, 2H), 7.41 (s, 3H), 7.28 (s, 2H), 7.17 (s, 2H), 7.20 – 7.12 (m, 0H), 5.09 (s, 1H), 4.35 (s, 1H), 4.23 (s, 1H), 3.96 (s, 2H), 3.83 (s, 1H), 1.77 (s, 3H), 1.36 (s, 4H). FT-IR (KBr),  $\nu$  ( $\text{cm}^{-1}$ ): 2864 (-C-H), 1487  $\text{cm}^{-1}$  (-C=N-, benzothiazole).

**CRA-MTBP<sub>(0)</sub>-mCP<sub>(8)</sub>**, mCP-N<sub>3</sub> (219.9 mg, 0.40 mmol) was used for 16 h to obtain a white solid (140.7 mg, 73.3%). <sup>1</sup>H NMR (400 MHz, CDCl<sub>3</sub>)  $\delta$  8.11 (s, 6H), 7.57 (dd, J = 17.0, 8.1 Hz, 5H), 7.28 (s, 2H), 7.16 (s, 2H), 5.32 (s, 1H), 5.08 (s, 1H), 4.33 (s, 0H), 4.22 (s, 2H), 4.05 (s, 0H), 3.96 (s, 2H), 1.84 (s, 3H), 1.47 (s, 3H), 1.39 (d, J = 7.2 Hz, 1H), 1.33 (s, 3H). FT-IR (KBr),  $\nu$  ( $\text{cm}^{-1}$ ): 2864 (-C-H), 1487  $\text{cm}^{-1}$  (-C=N-, benzothiazole).

### 3 $^1\text{H}$ NMR spectra

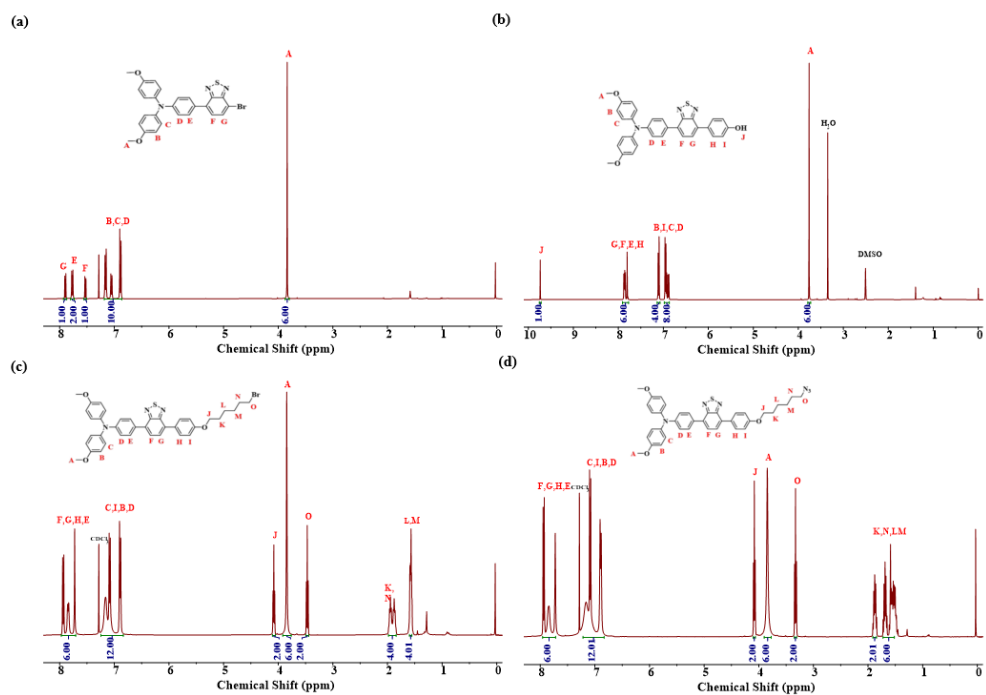

**Fig. S1.**  $^1\text{H}$  NMR spectra of (a) MTB-Br; (c) MTBP-Br and (d) MTBP- $\text{N}_3$  in  $\text{CDCl}_3$ ; (b) MTBP-OH in  $\text{DMSO-}d_6$ .

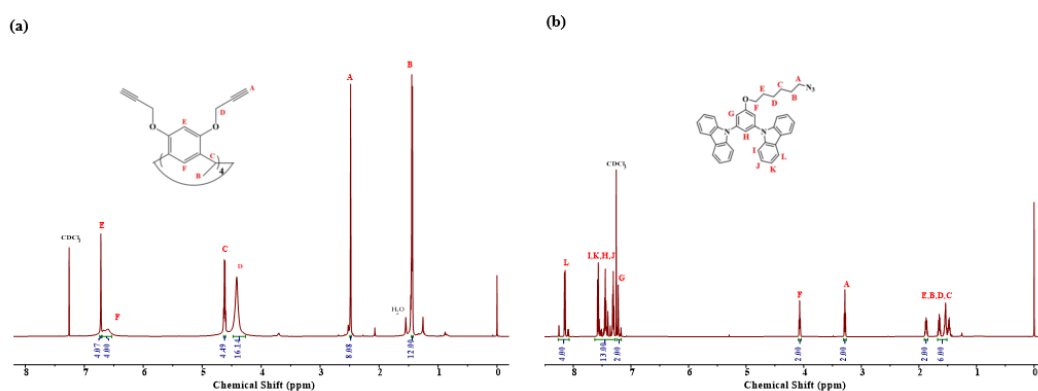

**Fig. S2.**  $^1\text{H}$  NMR spectra of (a) CRA-Alkyne and (b) mCP- $\text{N}_3$  in  $\text{CDCl}_3$ .



## 4 MALDI-TOF MS spectra

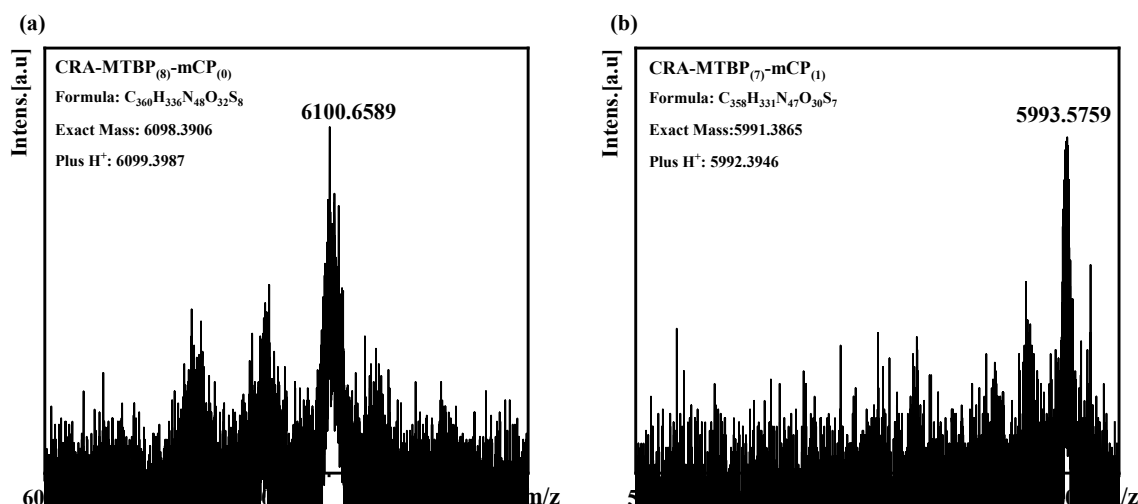

Fig. S3. MALDI-TOF MS spectra of (a) CRA-MTBP<sub>(8)</sub>-mCP<sub>(0)</sub> and CRA-MTBP<sub>(7)</sub>-mCP<sub>(1)</sub>.

## 5 FT-IR spectra

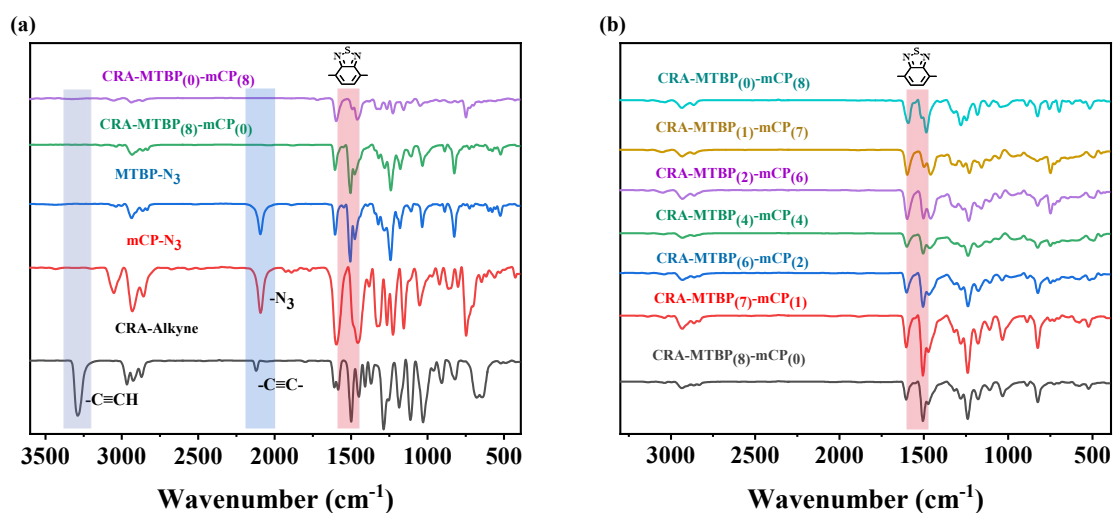

Fig. S4. FT-IR spectra of (a) CRA-MTBP<sub>(0)</sub>-mCP<sub>(8)</sub>, CRA-MTBP<sub>(8)</sub>-mCP<sub>(0)</sub>, CRA-Alkyne, MTBP-N<sub>3</sub>, and mCP-N<sub>3</sub>; (b) CRA-MTBP<sub>(X)</sub>-mCP<sub>(8-X)</sub> (X=8, 7, 6, 4, 2, 1 or 0).

## 6 Thermal analysis

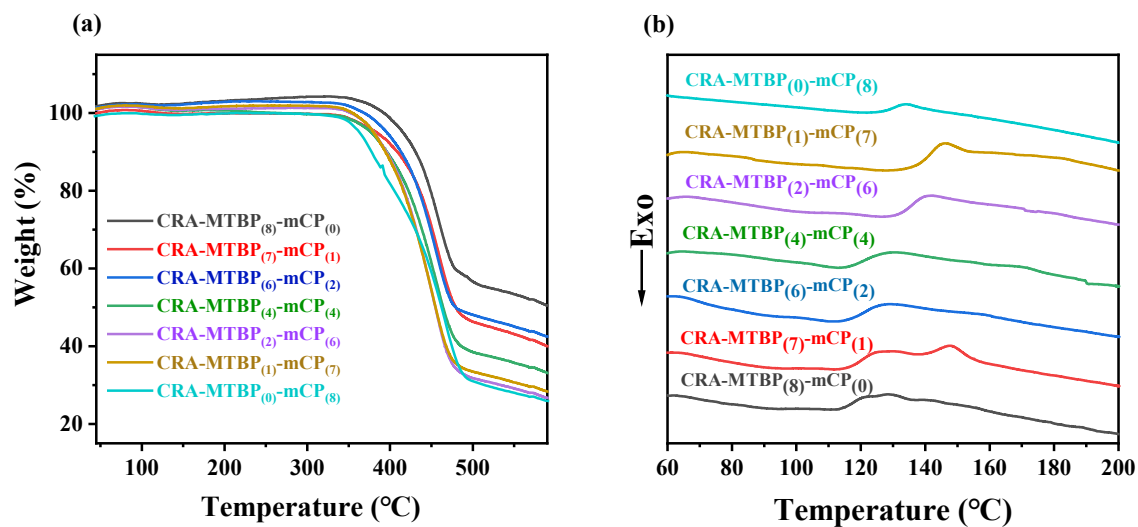

Fig. S5. (a) TGA curves and (b) DSC curves of CRA-MTBP<sub>(X)</sub>-mCP<sub>(8-X)</sub> (X=8, 7, 6, 4, 2, 1 or 0).

## 7 XRD patterns

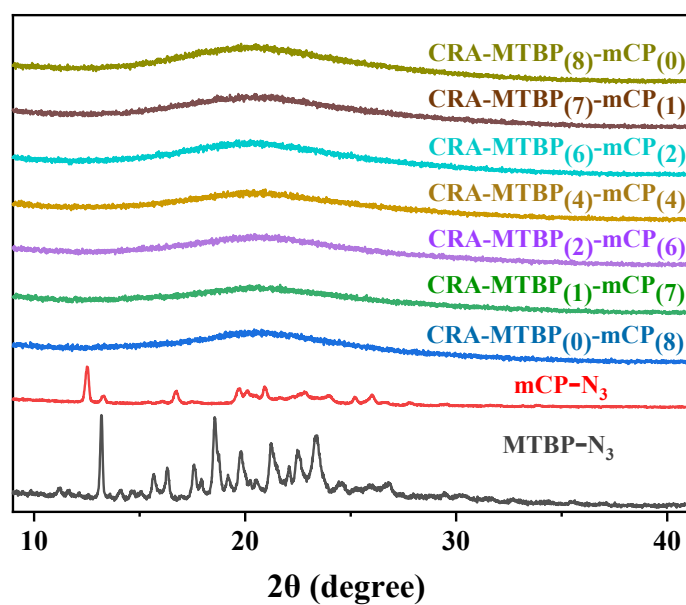

Fig. S6. XRD patterns of MTBP-N<sub>3</sub>, mCP-N<sub>3</sub> and CRA-MTBP<sub>(X)</sub>-mCP<sub>(8-X)</sub> (X=8, 7, 6, 4, 2, 1 or 0).

## 8 Cyclic voltammogram curves

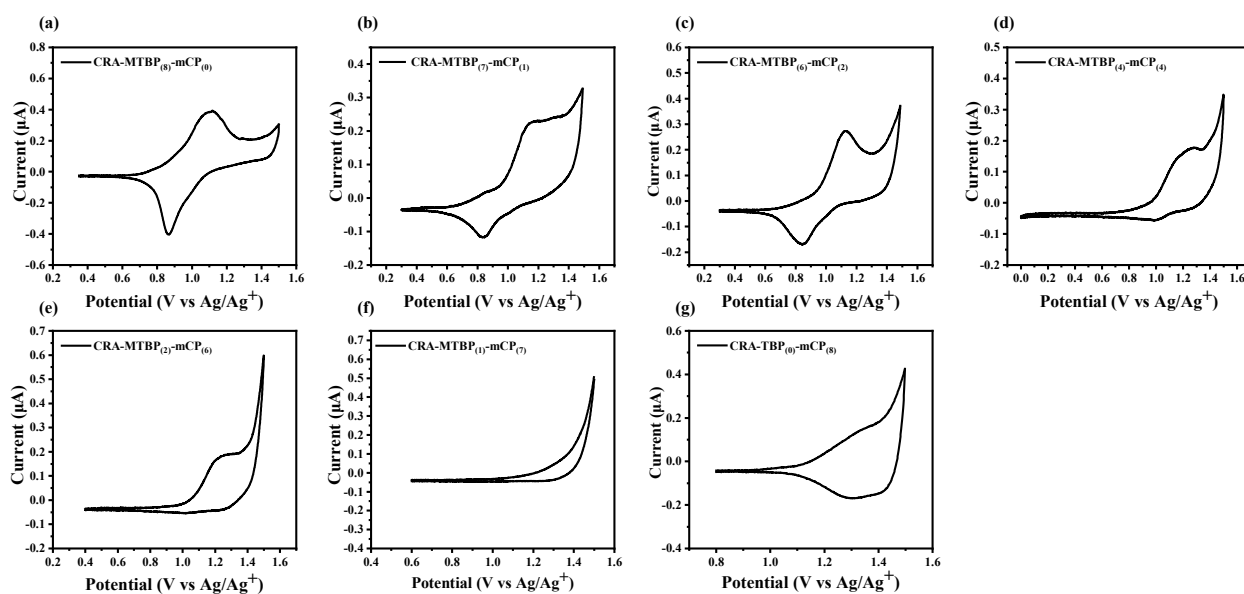

**Fig. S7.** Cyclic voltammograms of (a) CRA-MTBP<sub>(8)</sub>-mCP<sub>(0)</sub>; (b) CRA-MTBP<sub>(7)</sub>-mCP<sub>(1)</sub>; (c) CRA-MTBP<sub>(6)</sub>-mCP<sub>(2)</sub>; (d) CRA-MTBP<sub>(4)</sub>-mCP<sub>(4)</sub>; (e) CRA-MTBP<sub>(2)</sub>-mCP<sub>(6)</sub>; (f) CRA-MTBP<sub>(1)</sub>-mCP<sub>(7)</sub>; (g) CRA-MTBP<sub>(0)</sub>-mCP<sub>(8)</sub>.

## 9 Solvatochromic effect and supplementary photophysical properties

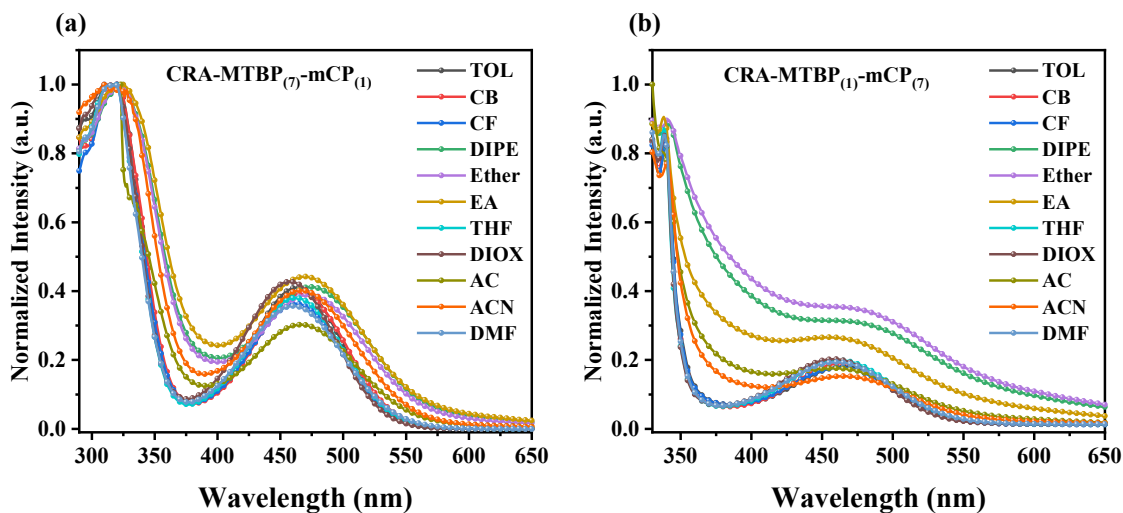

**Fig. S8.** UV-Vis absorption spectra of (a) CRA-MTBP<sub>(7)</sub>-mCP<sub>(1)</sub> and (b) CRA-MTBP<sub>(1)</sub>-mCP<sub>(7)</sub> in different solvents.

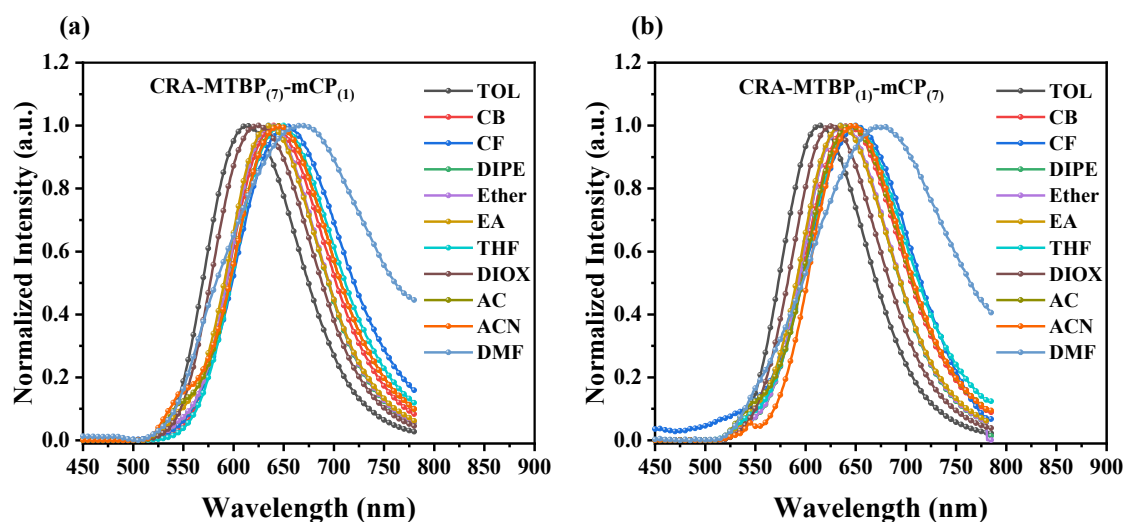

Fig. S9. PL spectra of (a) CRA-MTBP<sub>(7)</sub>-mCP<sub>(1)</sub> and (b) CRA-MTBP<sub>(1)</sub>-mCP<sub>(7)</sub> in different solvents.

## 10 Lippert–Mataga calculation

The effect of solvent polarity on the photophysical properties of CRA-TBP<sub>(X)</sub>-mCP<sub>(8-X)</sub> (X=1 or 7) and CRA-MTBP<sub>(X)</sub>-mCP<sub>(8-X)</sub> (X=1 or 7) was analyzed by using the Lippert-Mataga equation describing the interaction of the solvent with the dipole moment of the solute.

$$hc(\nu_a - \nu_f) = hc(\nu_a^0 - \nu_f^0) - \frac{2(\mu_e - \mu_g)^2}{a^3} f(\epsilon, n)$$

where  $f$  is the orientational polarizability of the solvent;  $\nu_a^0 - \nu_f^0$  corresponds to the Stokes shifts when  $f$  is zero;  $\mu_e$  is the excited-state dipole moment;  $\mu_g$  is the ground-state dipole moment;  $a$  is the solvent cavity (Onsager) radius, derived from the Avogadro number ( $N$ ), molecular weight ( $M$ ), and density ( $d = 1.0 \text{ g/cm}^3$ );  $\epsilon$  and  $n$  are the solvent dielectric and the solvent refractive index, respectively; and  $f(\epsilon, n)$  and  $a$  can be calculated, respectively, as follows.

$$f(\epsilon, n) = \frac{\epsilon - 1}{2\epsilon + 1} - \frac{n^2 - 1}{2n^2 + 1}$$

$$a = (3M/4N\pi d)^{1/3}$$

Table S2 Solvatochromic UV-PL data for Lippert-Mataga model of CRA-MTBP<sub>(X)</sub>-mCP<sub>(8-X)</sub> (X=1 or 7).

| Solvents | $\Delta f$ | CRA-MTBP <sub>(1)</sub> -mCP <sub>(7)</sub> |                  |                                     | CRA-MTBP <sub>(7)</sub> -mCP <sub>(1)</sub> |                  |                                     |
|----------|------------|---------------------------------------------|------------------|-------------------------------------|---------------------------------------------|------------------|-------------------------------------|
|          |            | $\lambda_a$ (nm)                            | $\lambda_f$ (nm) | $\nu_a - \nu_f$ (cm <sup>-1</sup> ) | $\lambda_a$ (nm)                            | $\lambda_f$ (nm) | $\nu_a - \nu_f$ (cm <sup>-1</sup> ) |
| TOL      | 0.014      | 455                                         | 617              | 5771                                | 457                                         | 617              | 5674                                |
| CB       | 0.143      | 463                                         | 640              | 5973                                | 465                                         | 641              | 5905                                |
| CF       | 0.149      | 462                                         | 641              | 6044                                | 463                                         | 642              | 6022                                |

Continue table S2 Solvatochromic UV-PL data for Lippert-Mataga model of CRA-MTBP<sub>(X)</sub>-mCP<sub>(8-X)</sub> (X=1 or 7).

| Solvents | $\Delta f$ | CRA-MTBP <sub>(1)</sub> -mCP <sub>(7)</sub> |                  |                                   | CRA-MTBP <sub>(7)</sub> -mCP <sub>(1)</sub> |                  |                                   |
|----------|------------|---------------------------------------------|------------------|-----------------------------------|---------------------------------------------|------------------|-----------------------------------|
|          |            | $\lambda_a$ (nm)                            | $\lambda_f$ (nm) | $\nu_a-\nu_f$ (cm <sup>-1</sup> ) | $\lambda_a$ (nm)                            | $\lambda_f$ (nm) | $\nu_a-\nu_f$ (cm <sup>-1</sup> ) |
| DIPE     | 0.145      | 467                                         | 643              | 5861                              | 469                                         | 645              | 5818                              |
| Ether    | 0.166      | 462                                         | 640              | 6020                              | 463                                         | 642              | 6022                              |
| EA       | 0.200      | 459                                         | 640              | 6161                              | 463                                         | 641              | 5998                              |
| THF      | 0.210      | 461                                         | 645              | 6188                              | 462                                         | 647              | 6189                              |
| DIOX     | 0.021      | 460                                         | 622              | 5662                              | 459                                         | 623              | 5735                              |
| AC       | 0.284      | 458                                         | 647              | 6378                              | 461                                         | 648              | 6260                              |
| ACN      | 0.307      | 463                                         | 646              | 6118                              | 464                                         | 649              | 6143                              |
| DMF      | 0.276      | 462                                         | 661              | 6516                              | 463                                         | 660              | 6447                              |

$\Delta f$  is the orientational polarizability of the solvent;  $\lambda_a$  is the maximum absorption wavelength corresponding to intramolecular charge transfer (ICT) measured in different solutions;  $\lambda_f$  is the maximum emission wavelength measured in different solutions;  $\nu_a-\nu_f$  is the Stokes shifts.

## 11 Device fabrication and measurement

The OLED device structure was glass/ITO/PEDOT: PSS (40 nm) /PVK: poly-TPD (4/1, m/m) (30 nm) /EML (30 nm) /TmPyPB (40 nm) /CsF (1.2 nm)/Al (50 nm). The specific energy level alignments and molecular structures of organic compounds used in devices are shown in Fig. S10.

The manufacturing steps are as follows. Indium-tin oxide (ITO)-coated glass substrates were cleaned sequentially by deionized water, acetone and ethanol for 30 minutes each. After the UV-ozone treatment for 20 minutes, PEDOT: PSS was spin-coated onto the ITO substrate to give a 40 nm thick layer, followed by annealing for 5 minutes to stabilize the PEDOT: PSS layer. PVK: poly-TPD (4/1, m/m) was spin-coated onto PEDOT: PSS layer from chlorobenzene and annealed at 125 °C for 15 minutes to serve as a hole transporting layer. 30 nm of CRA-MTBP<sub>(x)</sub>-mCP<sub>(8-x)</sub>, which was used as the emitting layer, was spin-coated onto the PVK: poly-TPD layer from chlorobenzene and dried in the glovebox at 100 °C for 10 minutes. The electron transport layer (ETL) of TmPyPB (40 nm), the CsF (1.2 nm) dielectric layer and the Al (50 nm) metal layer were deposited in a vacuum, under a pressure of  $8 \times 10^{-5}$  Pa. The evaporation rates for the material deposition were 1-2 Å/s for TmPyPB, 0.1 Å/s for CsF and 10 Å/s for Al. The device's active area is about 0.1 cm<sup>2</sup>. The XPOY-EOE-350-1100 instrument was used to measure the current density, luminance, and driving voltage characteristics, as well as record the EL spectrum and EQE. All device tests were conducted inside a nitrogen-filled glovebox at room temperature.

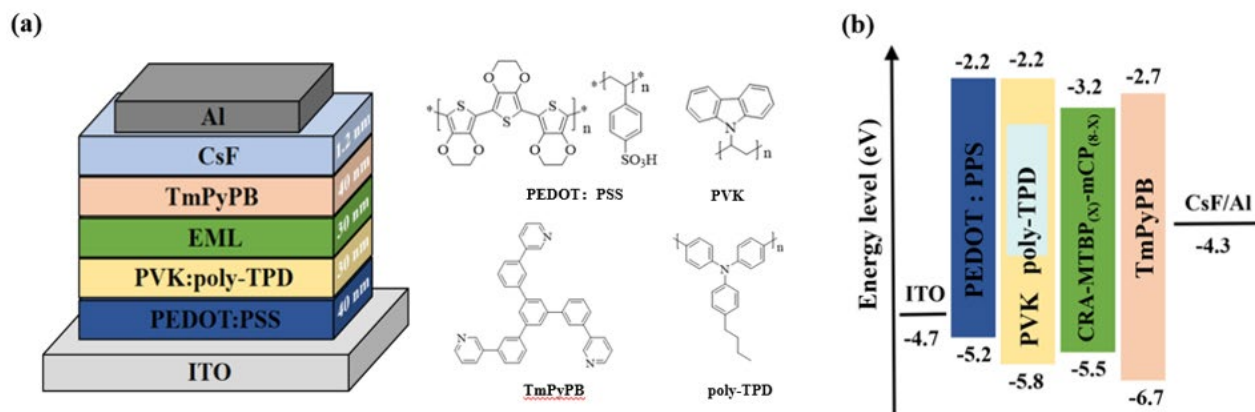

**Fig. S10.** (a) The device structure and chemical structures of organic compounds and polymers used; (b) The energy level alignments of CRA-MTBP<sub>(X)</sub>-mCP<sub>(8-X)</sub>.

## 12 OLED performance

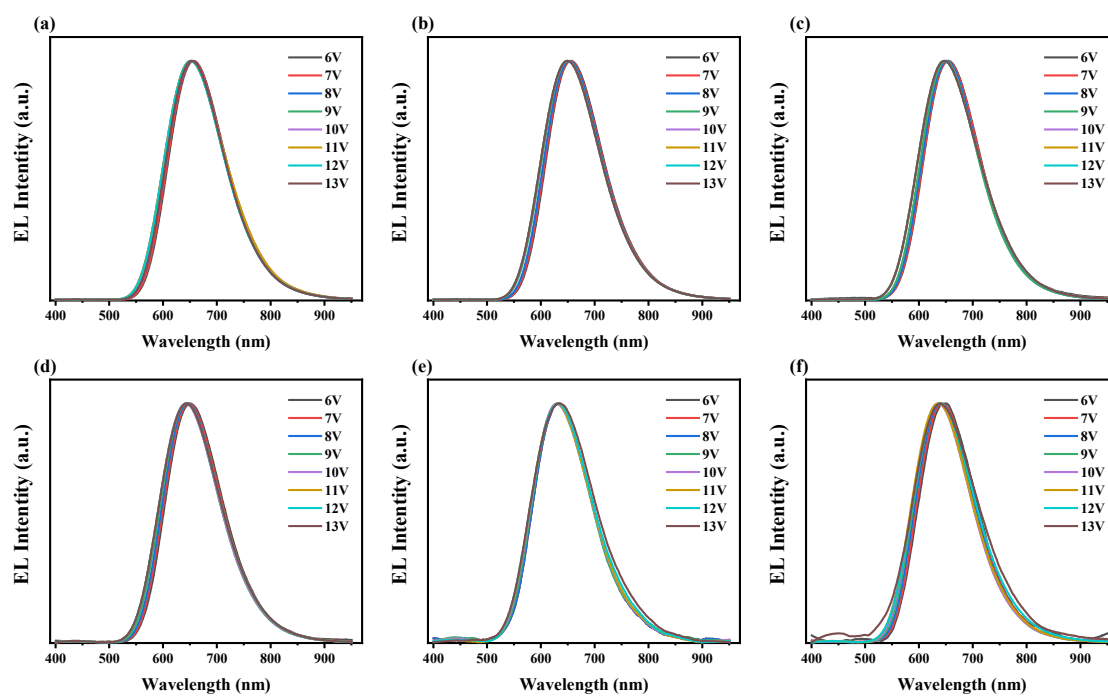

**Fig. S11.** EL spectra of (a) M1; (b) M2; (c) M3; (d) M4; (e) M5 and (f) M6 at different applied voltages.

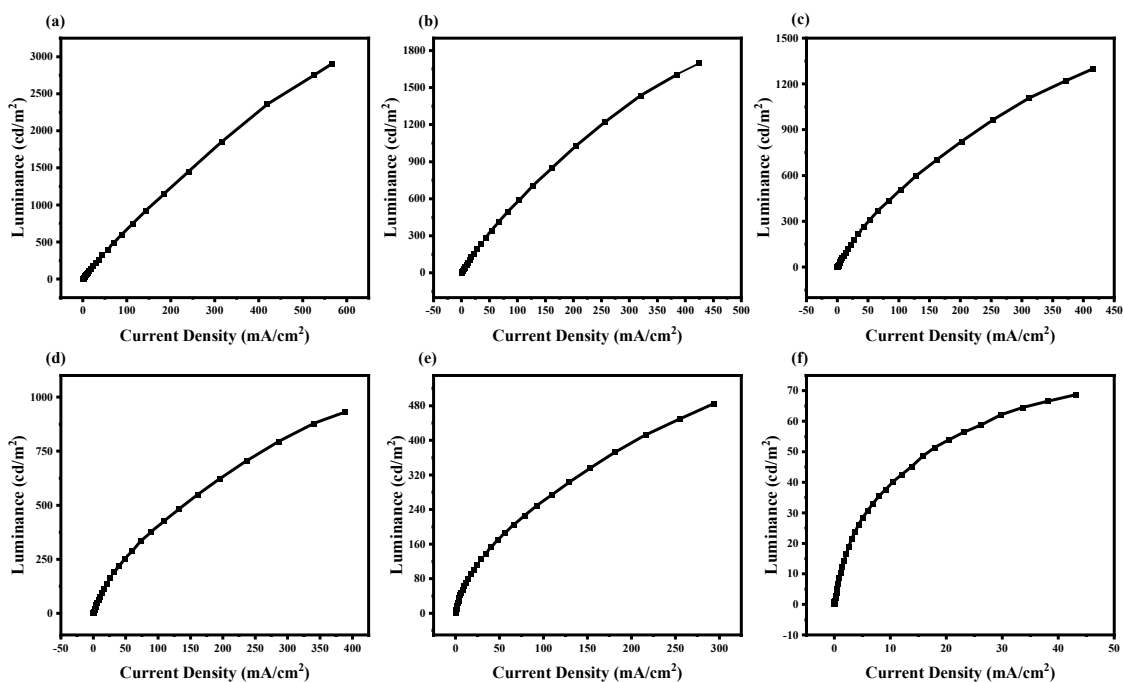

Fig. S12. The luminance-current density (L-J) characteristics of (a) M1; (b) M2; (c) M3; (d) M4; (e) M5 and (f) M6.

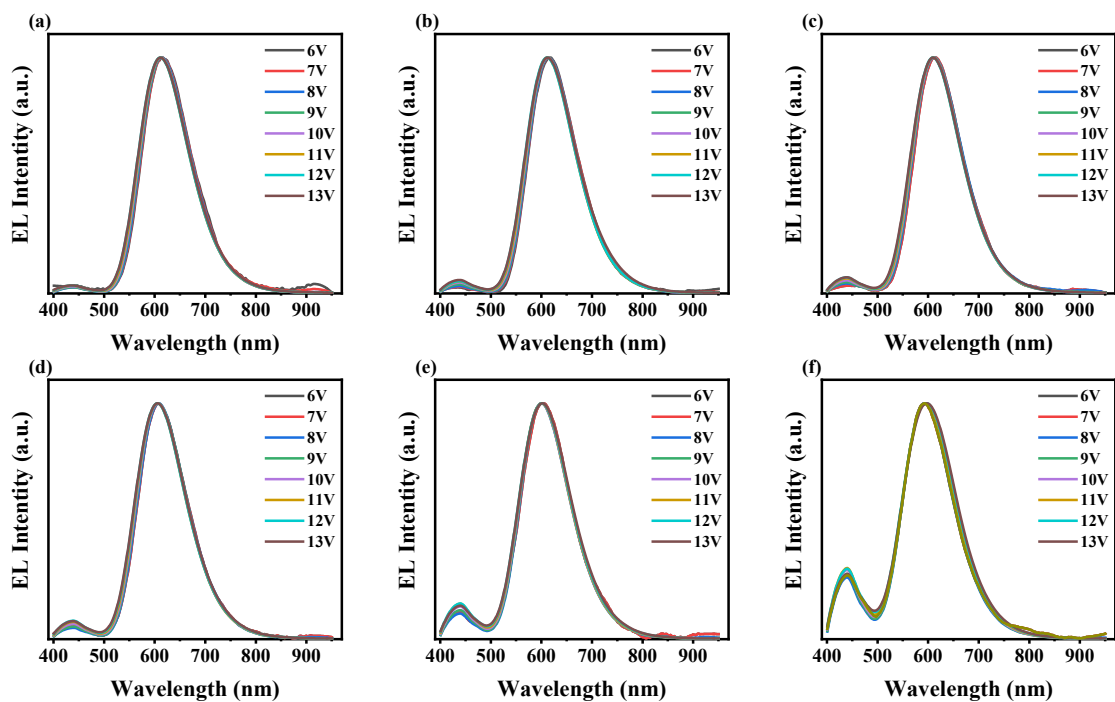

Fig. S13. EL spectra of (a) MD1; (b) MD2; (c) MD3; (d) MD4; (e) MD5 and (f) MD6 at different applied voltages.

## 13 Reference

[1] Wang FF, Qiu WD, Zeng J, Yuan P, Zong WS, Wu WB, et al. Calix [4] resorcinarene-based hyper-structured molecular thermally activated delayed fluorescence yellow-green emitters for non-doped OLEDs. *J Mater Chem C*.

2020; 8(13): 4469-4476.

[2] Zeng WX, Lai HY, Lee WK, Jiao M, Shiu YJ, Zhong C, et al. Achieving nearly 30% external quantum efficiency for orange-red organic light emitting diodes by employing thermally activated delayed fluorescence emitters composed of 1,8-naphthalimide-acridine hybrids. *Adv Mater.* 2018; 30(5): 1704961.

[3] Sun K, Y., Sun YB, Tian WW, Liu D, Feng YL, Sun YM, et al. Thermally activated delayed fluorescence dendrimers with exciplex-forming dendrons for low-voltage-driving and power-efficient solution-processed OLEDs. *J Mater Chem C.* 2018; 6(1): 43-9.

[4] Chen Q, Han BH. Prepolymerization and postpolymerization functionalization approaches to fluorescent conjugated carbazole-based glycopolymers via “click chemistry”. *J Polym Sci, Part A: Polym Chem.* 2009; 47(11): 2948-57.
